# Supplementary material
Source: MDPI journal article supplement (https://www.mdpi.com/2039-4713/14/2/37)
Supplement: s1 [file s1]

# Supplementary Materials: Heavy Metal(oid)s Contamination and Potential Ecological Risk Assessment in Agricultural Soils

Muhammad Saleem, David Pierce, Yuqiang Wang, Donald A. Sens, Seema Somji and Scott H. Garrett

**Table S1.** Instrumental operating parameters for ICP MS (iCAP, Thermo Fisher) for the selected metal(oid)s analysis.

|                           |                                              |
|---------------------------|----------------------------------------------|
| Plasma gas flow rate      | 14.0 L/min                                   |
| Auxiliary gas flow rate   | 0.8 L/min                                    |
| Carrier gas flow rate     | 0.8 L/min                                    |
| RF power                  | 1550 W                                       |
| Nebulizer gas flow        | 1.06 L/min                                   |
| Make up gas flow          | 0.25 L/min                                   |
| Dwell time                | 0.05 sec                                     |
| Analysis mode             | KED                                          |
| Nebulizer                 | 1.03 L/min                                   |
| Nebulizer                 | Microflow PFA-ST                             |
| Spray chamber             | Peltier-cooled quartz cyclonic spray chamber |
| Spray chamber Temperature | 2.7 °C                                       |
| Sampling depth            | 5.0 mm                                       |
| Sample uptake rate        | 0.4 mL/min                                   |
| Sampler/Skimmer Cone      | Nickel                                       |
| Detector mode             | Auto                                         |
| Number of replicates      | 3                                            |
| Sweeps                    | 10                                           |

**Table S2.** Instrumental operating parameters for Direct Mercury Analyzer (Milestone DMA-80 Hg analyzer) for the Mercury analysis

|                                 |                    |
|---------------------------------|--------------------|
| Carrier gas                     | High Purity Oxygen |
| Furnace 1, drying               | 70 s at 250 °C     |
| Furnace 1, decomposition        | 180 s at 650 °C    |
| Furnace 2, catalyst             | 565 °C             |
| Amalgamator heating temperature | 850 °C             |
| Cuvette temperature             | 120 °C             |
| Maximum start Temperature       | 250 °C             |
| amalgamator standby temperature | 170 °C             |
| Purge time P                    | 60 s               |
| amalgamator Heater time         | 12 s               |
| Signal recording time R         | 30 s               |
| O <sub>2</sub> Flow rate        | 7 L/h              |

**Table S3.** Limit of Detection, Limit of Quantitation ( $\mu\text{g/kg}$ ), Method Blank, SRM (2711a) recovery (%), Blank spike recovery (%) and relative percent difference (RPD, %) of duplicate sample analysis for the selected metal(oid)s analysis.

| Metal | LOD   | LOQ   | Method Blank | SRM Recovery (%) | Blank Spike Recovery (%) | Relative Percent Difference (%) |
|-------|-------|-------|--------------|------------------|--------------------------|---------------------------------|
| Mn    | 0.135 | 0.431 | ND           | 94.40%           | 119.0%                   | 6.996%                          |
| Fe    | 2.307 | 7.349 | ND           | 99.11%           | 137.3%                   | 7.395%                          |
| Co    | 0.043 | 0.137 | ND           | 85.96%           | 114.2%                   | 1.791%                          |
| Ni    | 0.516 | 1.643 | ND           | 94.53%           | 115.6%                   | 3.716%                          |
| Cu    | 0.141 | 0.450 | ND           | 97.76%           | 119.7%                   | 0.333%                          |
| Zn    | 1.372 | 4.370 | ND           | 103.2%           | 113.5%                   | 3.248%                          |
| As    | 0.054 | 0.171 | ND           | 105.6%           | 105.7%                   | 10.44%                          |
| Cr    | 0.823 | 2.621 | ND           | 63.23%           | 108.0%                   | 2.527%                          |
| Pb    | 0.050 | 0.159 | Detected     | 108.7%           | 107.0%                   | 3.635%                          |
| Cd    | 0.023 | 0.073 | ND           | 117.6%           | 110.1%                   | 5.950%                          |

ND; Not Detected (value < LOD); Detected, (LOD < value < LOQ).
